# Supplementary material for: A novel three-dimensional spherical CuBi2O4 consisting of nanocolumn arrays with persulfate and peroxymonosulfate activation functionalities for 1H-benzotriazole removal
Source: Royal Society of Chemistry journal article supplement (doi:10.1039/c5nr01428j), 2015-01-01
Supplement: c5nr01428j1.pdf [file c5nr01428j1.pdf]

## Supplementary Information

### **A novel three-dimensional spherical $\text{CuBi}_2\text{O}_4$ nanocolumn arrays with high performance persulfate and peroxymonosulfate activation functionalities for 1H-benzotriazole removal**

Wen-Da Oh<sup>a, b</sup>, Shun-Kuang Lua<sup>a, c</sup>, Zhili Dong<sup>a, c</sup>, Teik-Thye Lim<sup>a, b\*</sup>

<sup>a</sup>Nanyang Environment and Water Research Institute (NEWRI), Interdisciplinary Graduate School (IGS), Nanyang Technological University, 1 Cleantech Loop, CleanTech One, Singapore 637141, Singapore.

<sup>b</sup>Division of Environmental and Water Resources Engineering, School of Civil and Environmental Engineering, Nanyang Technological University, 50 Nanyang Avenue, Singapore 639798, Singapore.

<sup>c</sup>School of Materials Science and Engineering, Nanyang Technological University, 50 Nanyang Avenue, Singapore 639798, Singapore.

\*Corresponding author. Tel: +65-6790 6933, Fax: +65-6791 0676,

*E-mail address:* [ctlim@ntu.edu.sg](mailto:ctlim@ntu.edu.sg) (Lim T.T.)

## Supplementary Information

Fig. S1 shows the morphology of the  $\text{CuBi}_2\text{O}_4$  prepared with different hydrothermal conditions. From (a), temperature control resulted in a 3-D spherical nanocolumns arrays morphology with hollow core structure (b). Increasing the Cu to Bi concentration above the optimum condition resulted in the destruction of the CuB-H morphology (c). Decreasing the initial precursor concentration resulted in the decrease of microsphere size (d). The microsphere size can also be controlled by increasing the Cu to Bi ratio but resulted in CuO impurity.

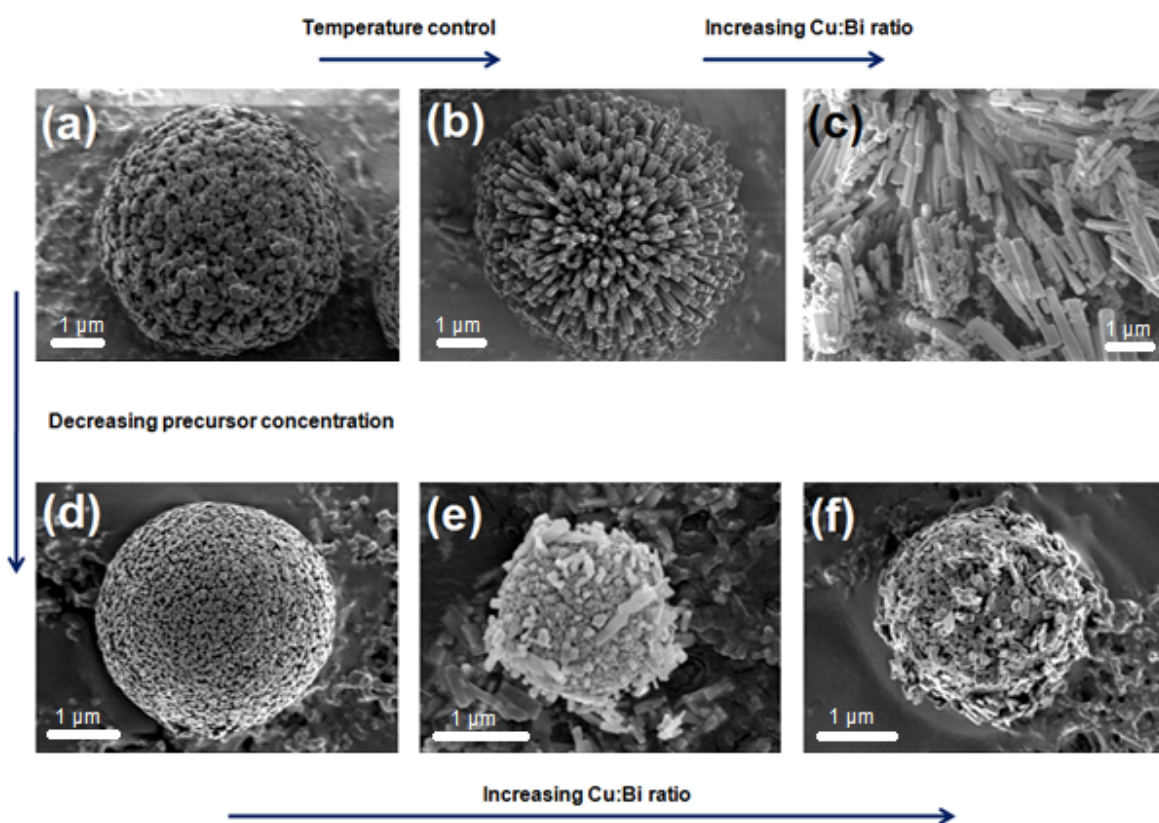

Figure S1: The FESEM images of  $\text{CuBi}_2\text{O}_4$  prepared with different conditions.

## Supplementary Information

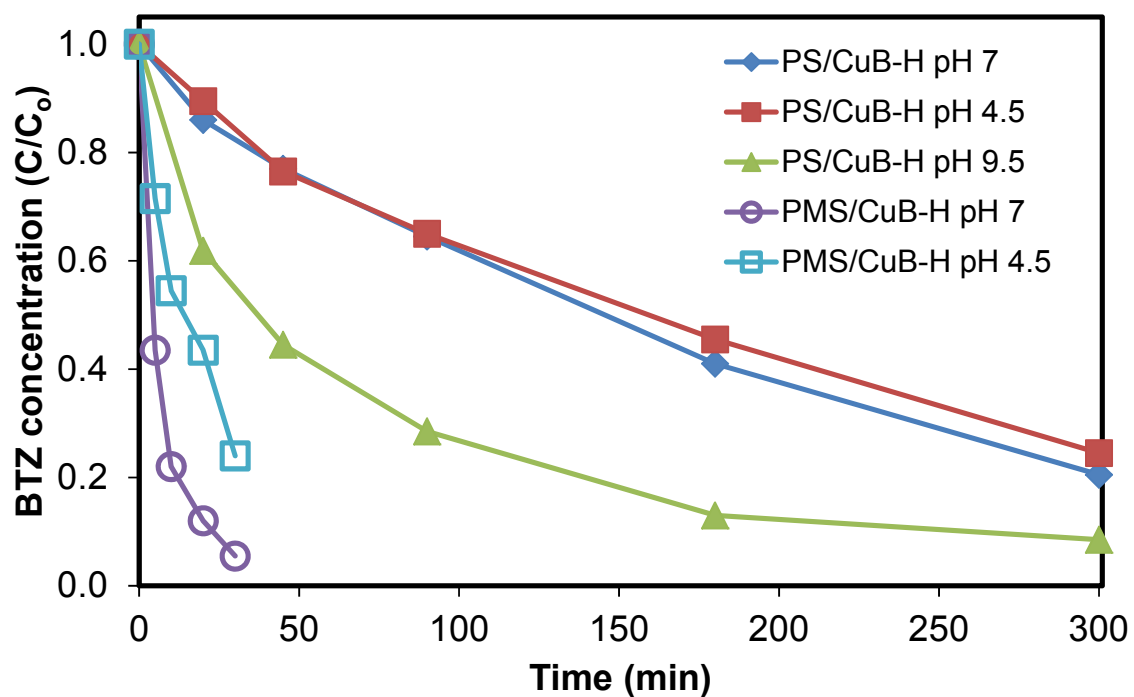

Fig. S2: Effects of pH of the degradation of BTZ. Conditions:  $[\text{CuB-H}] = 0.5 \text{ g L}^{-1}$ ,  $[\text{PS}]_0 = 0.1 \text{ g L}^{-1}$ ,  $[\text{PMS}]_0 = 0.05 \text{ g L}^{-1}$  and  $[\text{BTZ}]_0 = 2.5 \text{ mg L}^{-1}$ . At pH 9.5 for the PMS/CuB-H system, BTZ was completely removed in less than 5 min.

## Supplementary Information

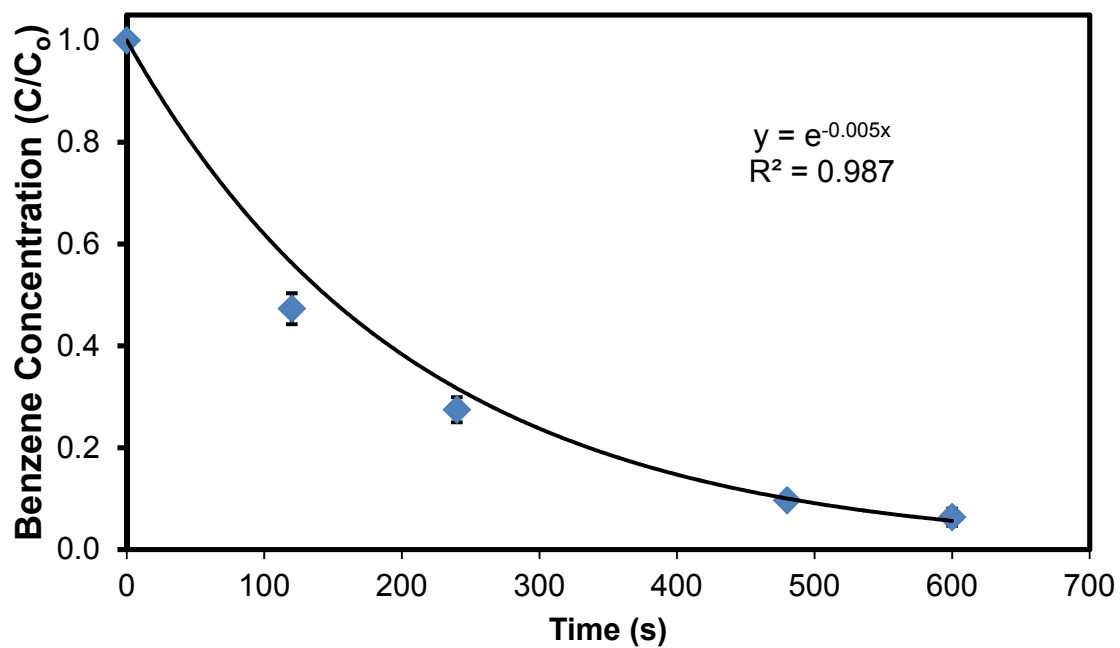

Fig. S3: Benzene oxidation by  $\text{SO}_4^{\cdot-}$ . Without catalyst, the benzene removal was  $< 5\%$ . Conditions:  $[\text{Benzene}]_0 = 2.5 \text{ mg L}^{-1}$ ,  $[\text{CuB-2.5}] = 0.5 \text{ g L}^{-1}$ ,  $[\text{PMS}]_0 = 0.2 \text{ g L}^{-1}$ ,  $[\text{pH}]_0 = 7$ .

## Supplementary Information

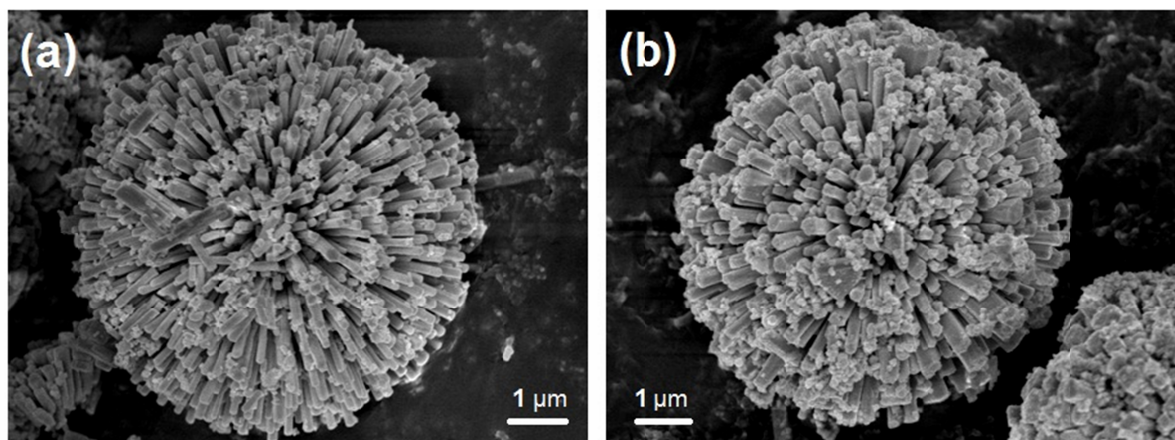

Figure S4: The FESEM images of  $\text{CuBi}_2\text{O}_4$  after catalytic reaction with (a) PS and (b) PMS. Reaction conditions:  $[\text{BTZ}]_0 = 2.5 \text{ mg L}^{-1}$ ,  $[\text{PS}]_0 = 0.8 \text{ g L}^{-1}$ ,  $[\text{oxone}]_0 = 0.6 \text{ g L}^{-1}$ ,  $t_{PS} = 90 \text{ min}$  and  $t_{PMS} = 10 \text{ min}$ .

## Supplementary Information

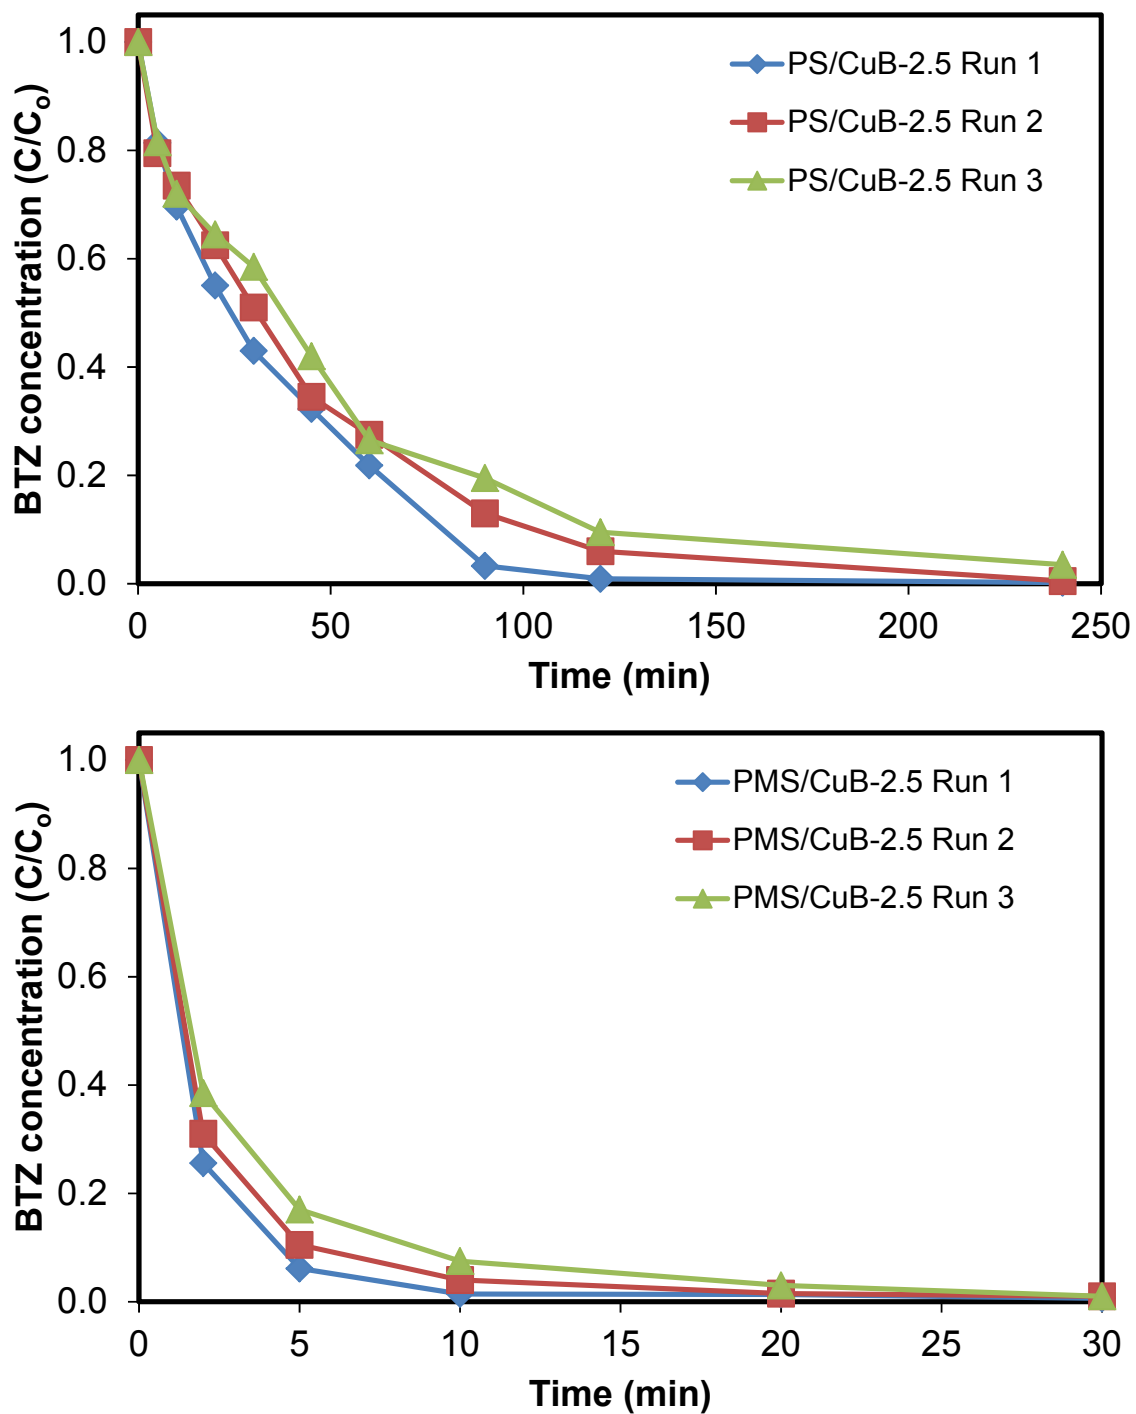

Fig. S5: The reusability of CuB-2.5 catalyst for 3 cycles for (a) PS/CuB-2.5 and (b) PMS/CuB-2.5 systems. Conditions:  $[\text{CuB-2.5}] = 0.5 \text{ g L}^{-1}$ ,  $[\text{BTZ}]_0 = 2.5 \text{ mg L}^{-1}$ ,  $[\text{PS}]_0 = 0.8 \text{ g L}^{-1}$ ,  $[\text{PMS}]_0 = 0.2 \text{ g L}^{-1}$ .

# Supplementary Information

(a) Initial BTZ solution

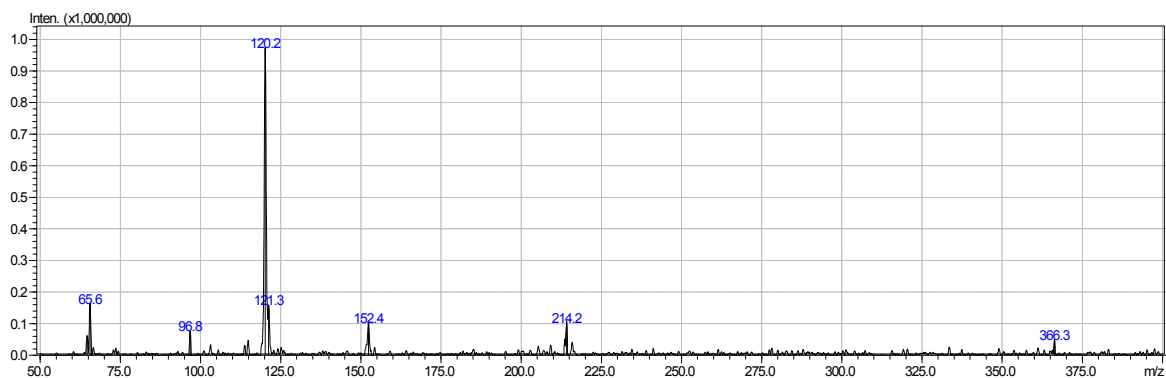

(b) After PS oxidation

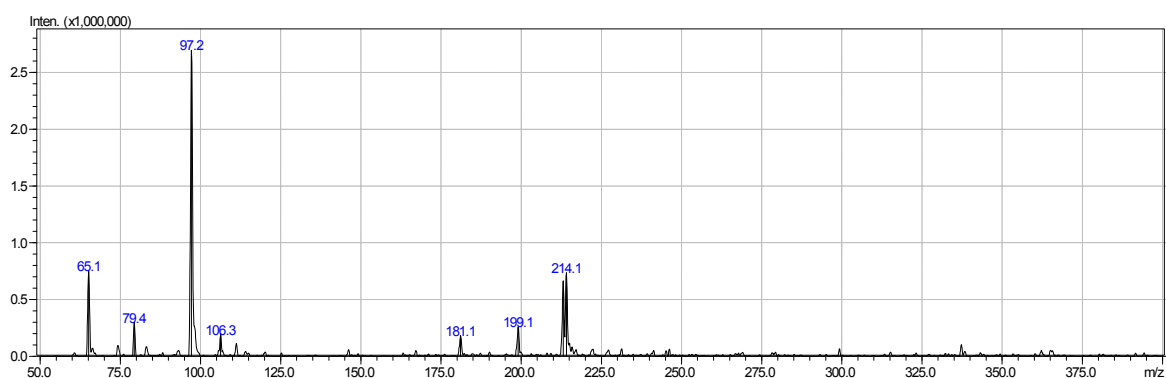

(c) After PMS oxidation

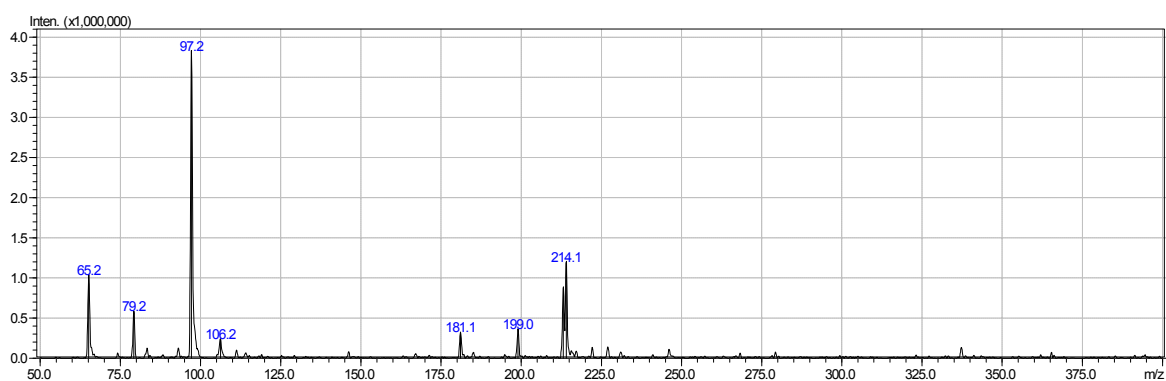

Fig. S4: Mass spectrum of initial BTZ solution and BTZ solution after treatment with (b) PS and (c) oxone. Reaction conditions:  $[\text{BTZ}]_0 = 2.5 \text{ mg L}^{-1}$ ,  $[\text{CuB-2.5}]_{\text{PS}} = 2.0 \text{ g L}^{-1}$ ,  $[\text{CuB-2.5}]_{\text{PMS}} = 0.5 \text{ g L}^{-1}$ ,  $[\text{PS}]_0 = 0.8 \text{ g L}^{-1}$ ,  $[\text{PMS}]_0 = 0.2 \text{ g L}^{-1}$ ,  $t_{\text{PS}} = 90 \text{ min}$  and  $t_{\text{PMS}} = 10 \text{ min}$ .
